# Supplementary material
Source: JCI journal article supplement (doi:10.1172/jci.insight.200422)
Supplement: sd2 [file 2]

Full unedited gel for Figure 1F

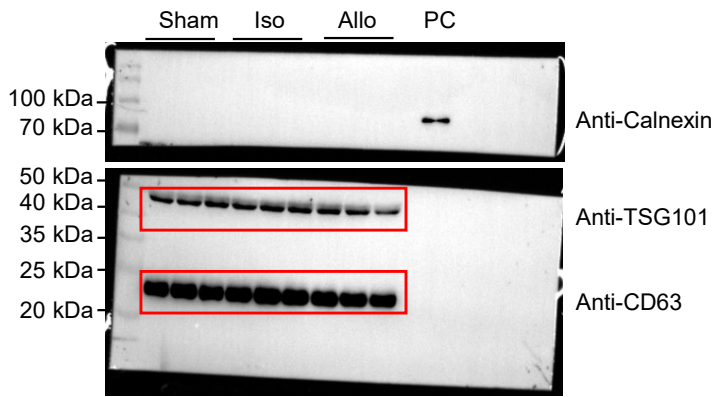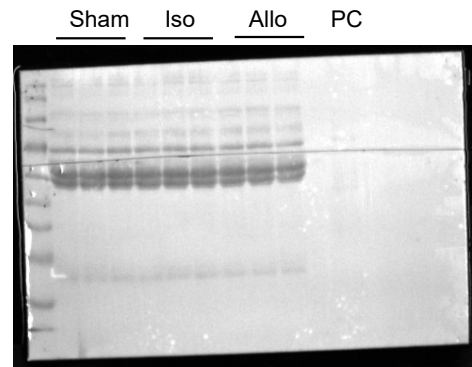

Ponceau S staining

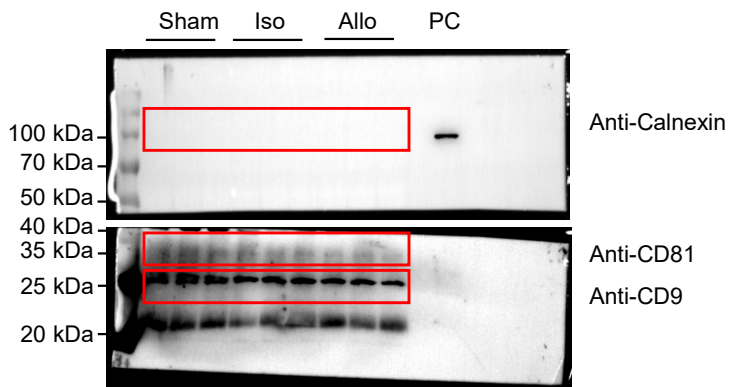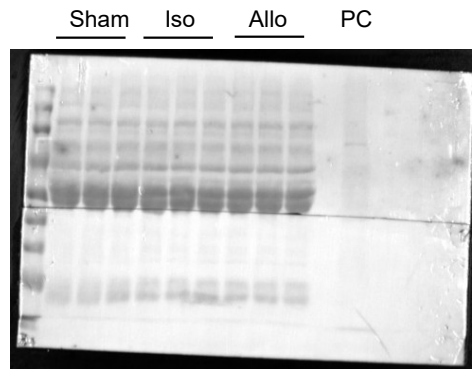

Ponceau S staining

Full unedited gel for Figure 4E

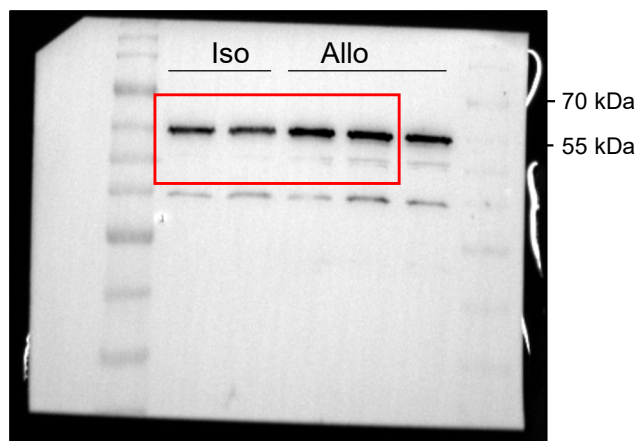

Anti-ATIII

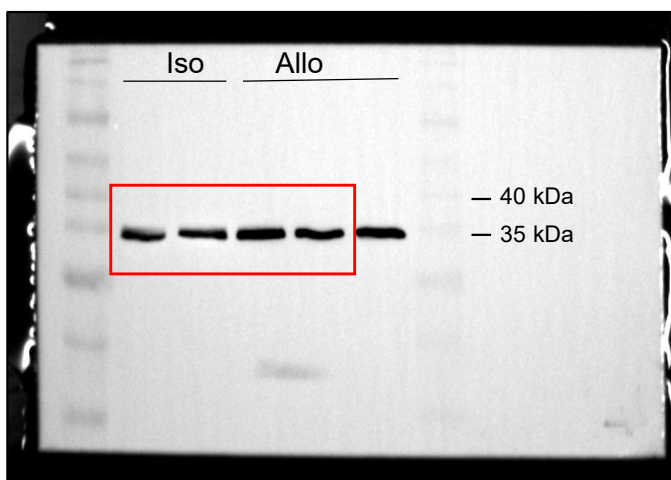

Anti-GAPDH

Full unedited gel for Figure 6C

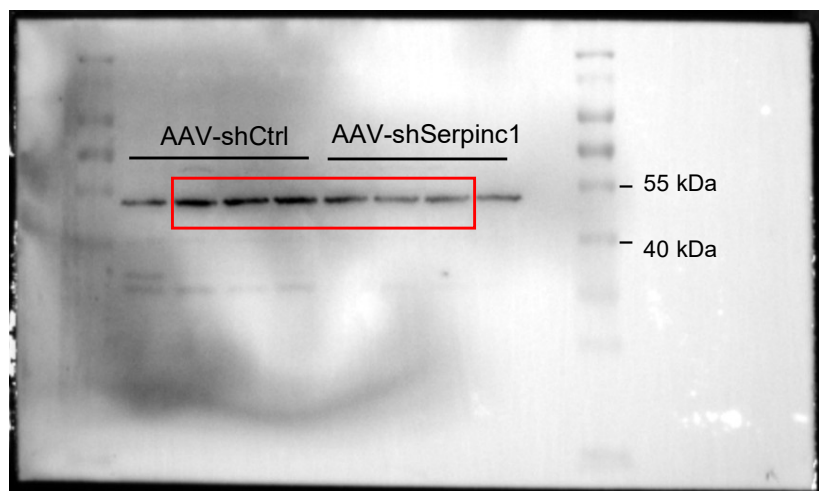

Anti-ATIII

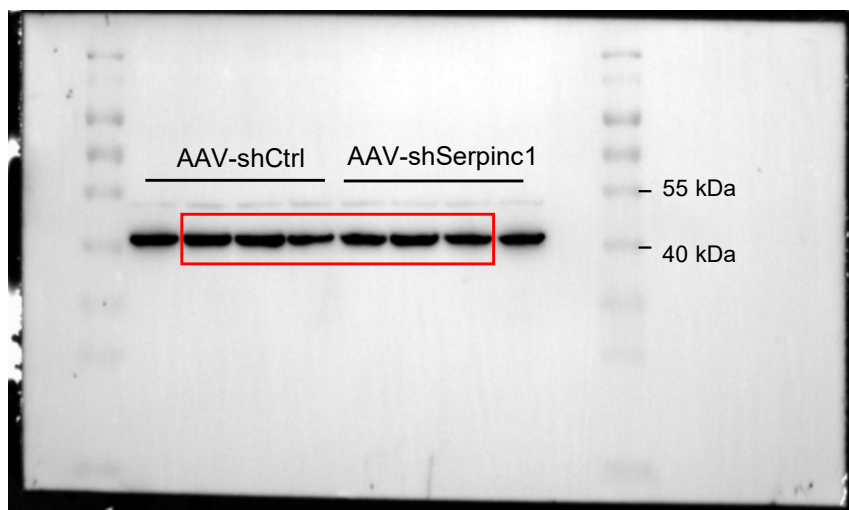

Anti-Actin

Full unedited gel for Figure 7C

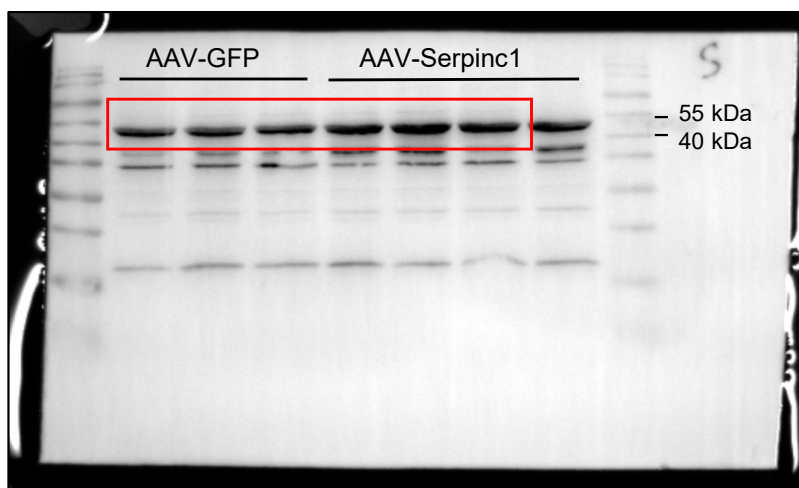

Anti-ATIII

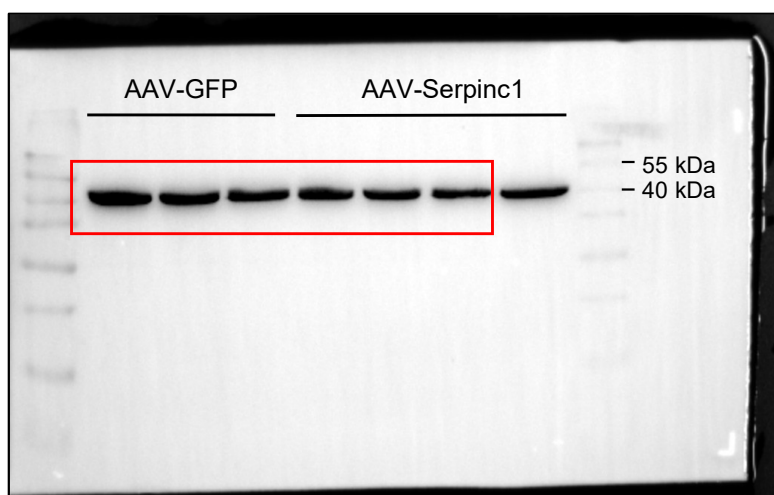

Anti-Actin

# Full unedited gel for Supplementary Figure 4

|              |   |   |   |
|--------------|---|---|---|
| Proteinase K | - | + | + |
| Triton X-100 | - | - | + |

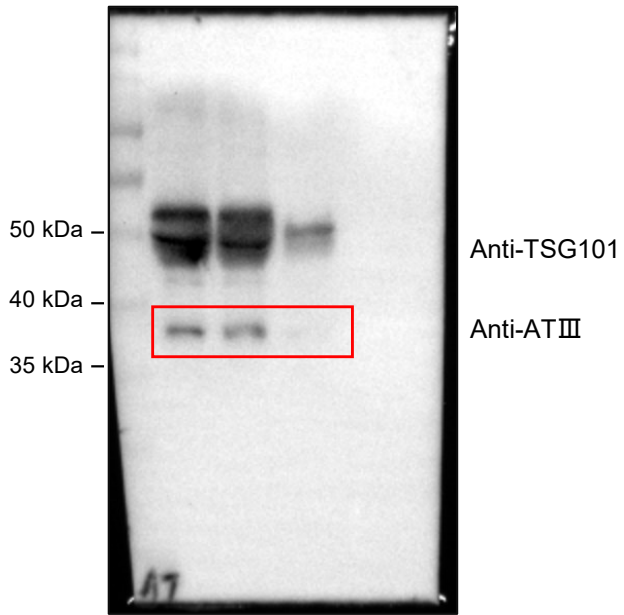

Long exposure

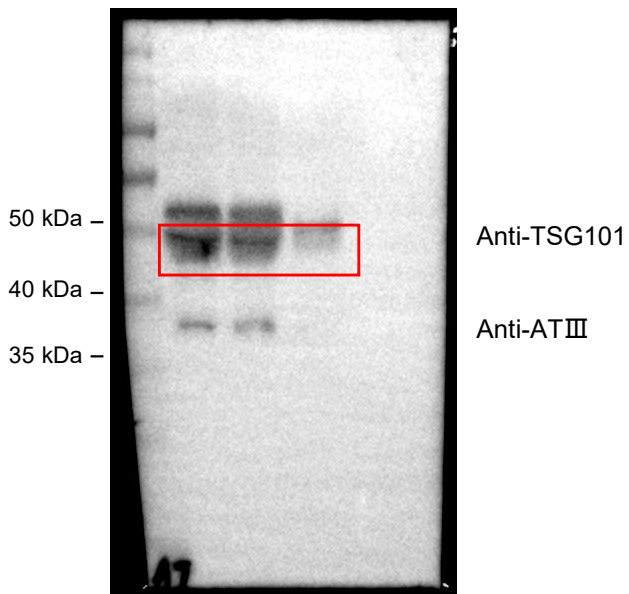

Short exposure

|              |   |   |   |
|--------------|---|---|---|
| Proteinase K | - | + | + |
| Triton X-100 | - | - | + |

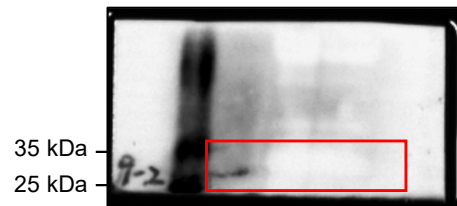

Anti-CD9

Full unedited gel for Supplementary Figure 5

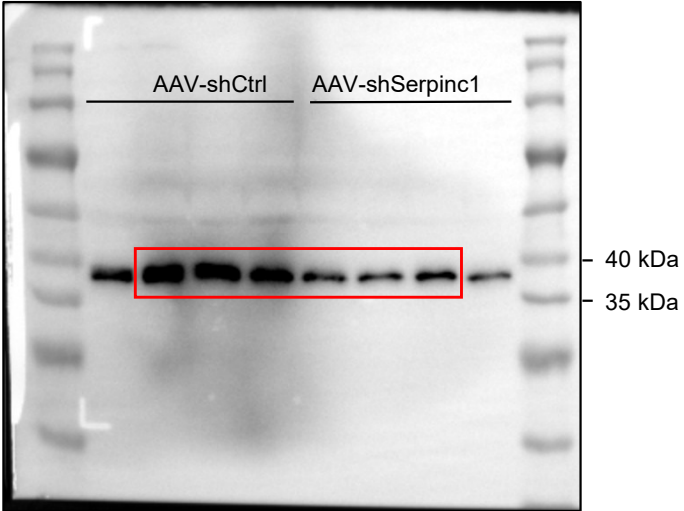

Anti-ATIII

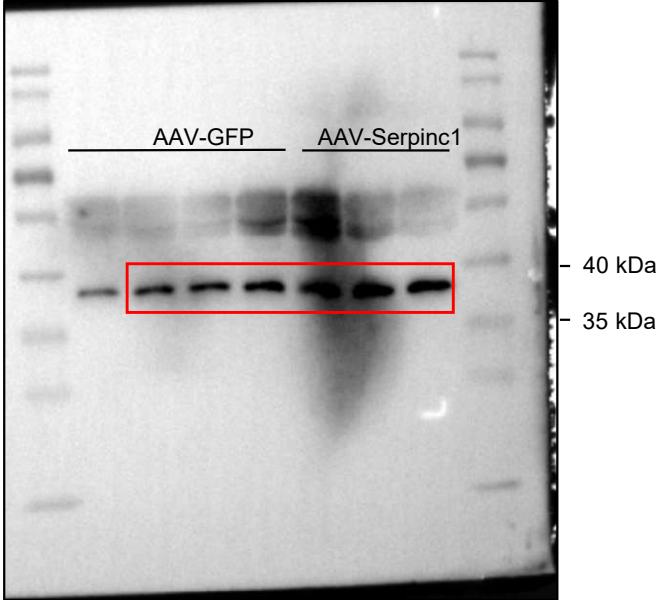

Anti-ATIII

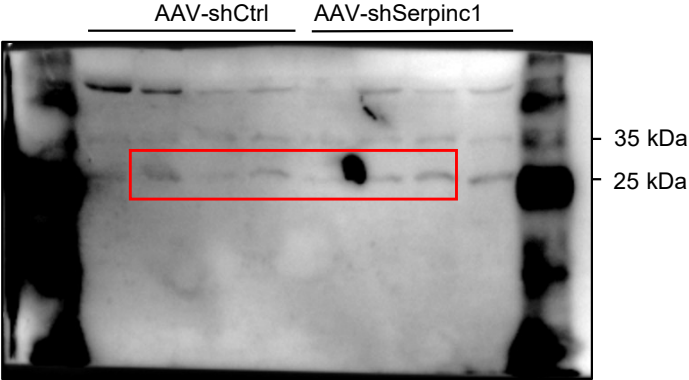

Anti-CD9

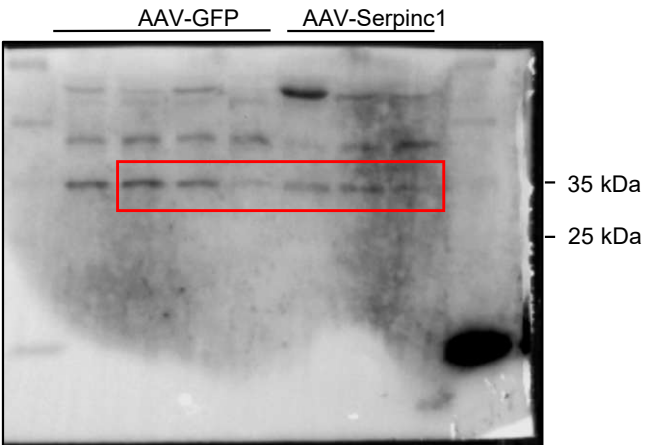

Anti-CD9
